# Supplementary material for: Effect of menstrual cycle phase, menstrual irregularities and hormonal contraceptive use on anterior knee laxity and non-contact anterior cruciate ligament injury occurrence in women: a protocol for a systematic review and meta-analysis
Source: HighWire-hosted journal article supplement (doi:10.1136/bmjsem-2021-001170), 2021-10-01

## Supporting Information

---

**Title:** The effect of menstrual cycle phase, menstrual irregularities, and hormonal contraceptive use on anterior cruciate ligament laxity and non-contact injury occurrence in women: a protocol for a systematic review and meta-analysis

**Authors:** Elisa Nédélec, Elvis Foli, Sandra J Shultz, Paul A Swinton, Eimear Dolan, Kevin Enright, Jessica Piasecki, Joseph J Matthews, Craig Sale and Kirsty J Elliott-Sale

---

## Contents

1. Preliminary PubMed search strategy
2. PRISMA flow diagram template

1. Preliminary PubMed search strategy – <https://pubmed.ncbi.nlm.nih.gov/>

**Search Builder**

1. "menstrual cycle"[All Fields] OR hormon\*[All Fields] OR follicular[All Fields] OR luteal[All Fields] OR progesterone[All Fields] OR ?estrogen[All Fields] OR progestin\*[All Fields] OR relaxin[All Fields] OR "birth control"[All Fields] OR contracepti\*[All Fields]
2. {anterior cruciate ligament}[MeSH Major Topic]
3. laxity[All Fields] OR rupture[All Fields] OR injury[All Fields] OR strain[All Fields] OR sprain[All Fields] OR tear\*[All Fields] OR stiff\*[All Fields] OR strength[All Fields]
4. #2 AND #3
5. #1 AND #4

**Filters or Limiters:** None applied

**Search conducted:** April 30, 2021

**Paper identified:** 225

| Overview           |                                                                                                                                                                                                                                                                                                                                                                                                                                                                                                                                                                                         |
|--------------------|-----------------------------------------------------------------------------------------------------------------------------------------------------------------------------------------------------------------------------------------------------------------------------------------------------------------------------------------------------------------------------------------------------------------------------------------------------------------------------------------------------------------------------------------------------------------------------------------|
| <b>Full Search</b> | ("menstrual cycle"[All Fields] OR "hormon*" [All Fields] OR "follicular"[All Fields] OR "luteal"[All Fields] OR ("progesterone"[MeSH Terms] OR "progesterone"[All Fields] OR "progesteron"[All Fields] OR "progesterones"[All Fields] OR "progesterone s"[All Fields] OR "progesteronic"[All Fields] OR "progesterons"[All Fields]) OR ("estrogen s"[All Fields] OR "estrogene"[All Fields] OR "estrogenes"[All Fields] OR "estrogenic"[All Fields] OR "estrogenically"[All Fields] OR "estrogenicities"[All Fields] OR "estrogenicity"[All Fields] OR "estrogenization"[All Fields] OR |

|  |                                                                                                                                                                                                                                                                                                                                                                                                                                                                                                                                                                                                                                                                                                                                                                                                                                                                                                                                                                                                                                                                                                                                                                                                                                                                                                                                                                                                                                                                                                                                                                                                                                                                                                                                                                                                                                                                                                                      |
|--|----------------------------------------------------------------------------------------------------------------------------------------------------------------------------------------------------------------------------------------------------------------------------------------------------------------------------------------------------------------------------------------------------------------------------------------------------------------------------------------------------------------------------------------------------------------------------------------------------------------------------------------------------------------------------------------------------------------------------------------------------------------------------------------------------------------------------------------------------------------------------------------------------------------------------------------------------------------------------------------------------------------------------------------------------------------------------------------------------------------------------------------------------------------------------------------------------------------------------------------------------------------------------------------------------------------------------------------------------------------------------------------------------------------------------------------------------------------------------------------------------------------------------------------------------------------------------------------------------------------------------------------------------------------------------------------------------------------------------------------------------------------------------------------------------------------------------------------------------------------------------------------------------------------------|
|  | <p>"estrogenized"[All Fields] OR "oestrogen"[All Fields] OR "estrogens"[Pharmacological Action] OR "estrogens"[MeSH Terms] OR "estrogens"[All Fields] OR "estrogen"[All Fields] OR "oestrogen s"[All Fields] OR "oestrogenic"[All Fields] OR "oestrogenically"[All Fields] OR "oestrogenicity"[All Fields] OR "oestrogenization"[All Fields] OR "oestrogens"[All Fields]) OR "progestin*"[All Fields] OR ("relaxin"[MeSH Terms] OR "relaxin"[All Fields] OR "relaxin s"[All Fields] OR "relaxins"[All Fields]) OR "birth control"[All Fields] OR "contracepti*"[All Fields]) AND (("anterior cruciate ligament"[MeSH Terms] OR ("anterior"[All Fields] AND "cruciate"[All Fields] AND "ligament"[All Fields]) OR "anterior cruciate ligament"[All Fields]) AND ("laxities"[All Fields] OR "laxity"[All Fields] OR ("ruptur"[All Fields] OR "rupture"[MeSH Terms] OR "rupture"[All Fields] OR "ruptured"[All Fields] OR "ruptures"[All Fields] OR "rupturing"[All Fields]) OR ("injurie"[All Fields] OR "injured"[All Fields] OR "injuries"[MeSH Subheading] OR "injuries"[All Fields] OR "wounds and injuries"[MeSH Terms] OR ("wounds"[All Fields] AND "injuries"[All Fields]) OR "wounds and injuries"[All Fields] OR "injurious"[All Fields] OR "injury s"[All Fields] OR "injured"[All Fields] OR "injurys"[All Fields] OR "injury"[All Fields]) OR ("sprains and strains"[MeSH Terms] OR ("sprains"[All Fields] AND "strains"[All Fields]) OR "sprains and strains"[All Fields] OR "strain"[All Fields] OR "strains"[All Fields] OR "strain s"[All Fields]) OR ("sprained"[All Fields] OR "spraining"[All Fields] OR "sprains and strains"[MeSH Terms] OR ("sprains"[All Fields] AND "strains"[All Fields]) OR "sprains and strains"[All Fields] OR "sprain"[All Fields] OR "sprains"[All Fields]) OR "tear*"[All Fields] OR "stiff*"[All Fields] OR ("strength"[All Fields] OR "strengths"[All Fields]))))</p> |
|--|----------------------------------------------------------------------------------------------------------------------------------------------------------------------------------------------------------------------------------------------------------------------------------------------------------------------------------------------------------------------------------------------------------------------------------------------------------------------------------------------------------------------------------------------------------------------------------------------------------------------------------------------------------------------------------------------------------------------------------------------------------------------------------------------------------------------------------------------------------------------------------------------------------------------------------------------------------------------------------------------------------------------------------------------------------------------------------------------------------------------------------------------------------------------------------------------------------------------------------------------------------------------------------------------------------------------------------------------------------------------------------------------------------------------------------------------------------------------------------------------------------------------------------------------------------------------------------------------------------------------------------------------------------------------------------------------------------------------------------------------------------------------------------------------------------------------------------------------------------------------------------------------------------------------|

| <b>Breakdown</b>      |                                                                                                                                                                                                                                                                       |
|-----------------------|-----------------------------------------------------------------------------------------------------------------------------------------------------------------------------------------------------------------------------------------------------------------------|
| <b>Exposures</b>      | "menstrual cycle"[All Fields] OR hormon*[All Fields] OR follicular[All Fields] OR luteal[All Fields] OR progesterone[All Fields] OR ?estrogen[All Fields] OR progestin*[All Fields] OR relaxin[All Fields] OR "birth control"[All Fields] OR contracepti*[All Fields] |
| <b>Outcome Part 1</b> | {anterior cruciate ligament}[MeSH Major Topic]                                                                                                                                                                                                                        |
| <b>Outcome Part 2</b> | laxity[All Fields] OR rupture[All Fields] OR injury[All Fields] OR strain[All Fields] OR sprain[All Fields] OR tear*[All Fields] OR stiff*[All Fields] OR strength[All Fields]                                                                                        |

## 2. PRISMA flow diagram depicting the search process

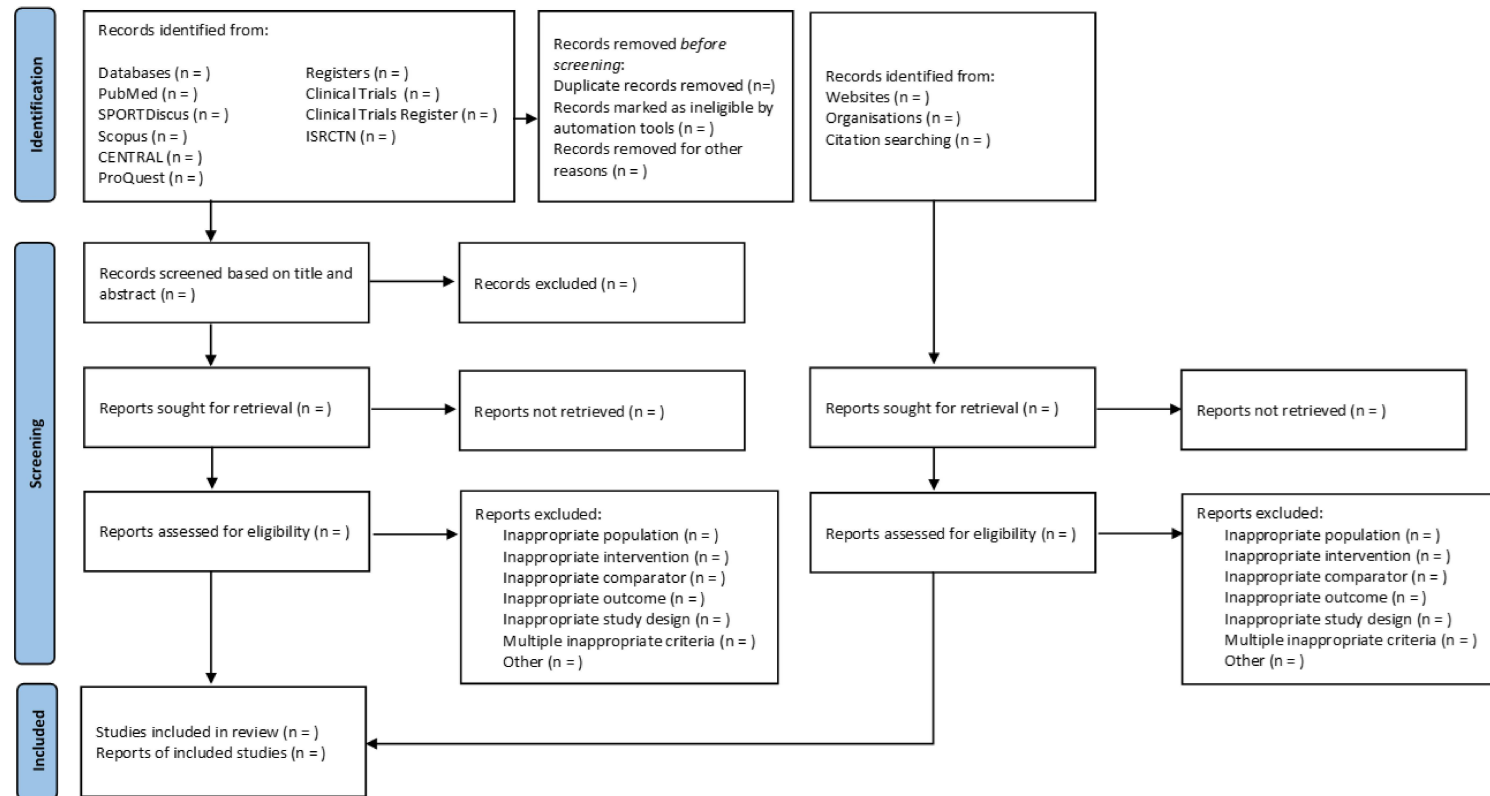

Supplement: bmjsem-2021-001170supp001_data_supplement.pdf [file bmjsem-2021-001170supp001_data_supplement.pdf]
